# Supplementary material for: Experiential exposure as the key to recruiting medical students into pathology
Source: PubMed Central journal article supplement — Acad Pathol. 2023 Apr 13;10(2):100074. doi: 10.1016/j.acpath.2023.100074 (PMC10139861; doi:10.1016/j.acpath.2023.100074), 2023-04-13
Supplement: mmc1.pdf [file mmc1.pdf]

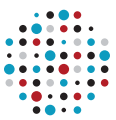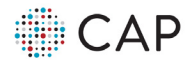

**PATHOLOGIST  
PIPELINE  
CHAMPION**

# Ideas and Resources to Engage and Expose Medical Students to Pathology

These ideas and activities can be inserted anywhere in the curriculum (pre-clerkship, clerkship, and post-clerkship).

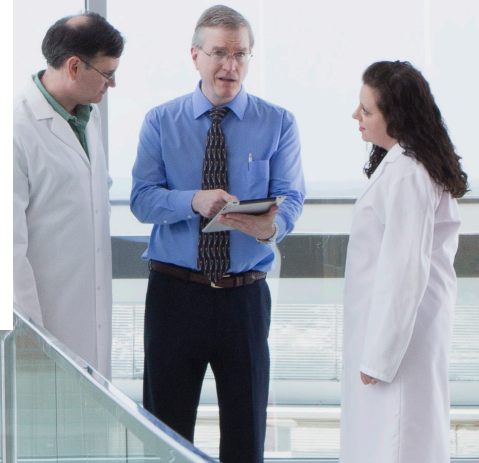

## APPLICABLE STAGES OF SPECIALTY DECISION-MAKING\*

|                                                               | Thought | Exploration | Decision | Action |
|---------------------------------------------------------------|---------|-------------|----------|--------|
| <b>Mentoring</b>                                              |         |             |          |        |
| Pathology student interest group                              | ●       | ●           | ●        | ●      |
| Pathology electives or selectives (3rd- or 4th-year students) |         | ●           | ●        |        |
| Career specialty days                                         | ●       | ●           |          |        |
| Capstone project                                              |         | ●           | ●        |        |
| Awards (one, multiple, certificates)                          |         |             |          | ●      |
| Pathology Honor Society (ICPI)                                |         |             |          | ●      |
| Pathology mentors                                             | ●       | ●           | ●        | ●      |
| Pathology lunches/dinners                                     | ●       | ●           | ●        |        |
| Career talks/specialty talks                                  | ●       | ●           | ●        |        |
| Materials to hand out about careers in pathology              | ●       | ●           | ●        |        |

**\*Stages of Specialty Decision-Making:**

1. Thought stage: Thinking about specialty choice; recognizing hallmarks of specialties that spark interest.
2. Exploration stage: Investigating available resources and opportunities and identifying role models to learn about the specialties of interest.
3. Decision stage: Participating in activities, rotations, and mentoring to acquire the concrete information and experiences needed to choose a specialty.
4. Action stage: Applying for a residency in the chosen specialty.

APPLICABLE STAGES OF SPECIALTY DECISION-MAKING\*

|                                              | Thought | Exploration | Decision | Action |
|----------------------------------------------|---------|-------------|----------|--------|
| <b>Hands on experiences</b>                  |         |             |          |        |
| Tissue conferences                           | ●       | ●           | ●        |        |
| Tumor boards                                 | ●       | ●           | ●        |        |
| Digitized slide conferences                  | ●       | ●           | ●        |        |
| Research opportunities                       | ●       | ●           | ●        | ●      |
| Shadowing                                    | ●       | ●           | ●        | ●      |
| Participating in frozen sections             | ●       | ●           | ●        |        |
| Partnering with residents                    | ●       | ●           | ●        | ●      |
| Viewing autopsies                            | ●       | ●           | ●        |        |
| Blood banking                                | ●       | ●           | ●        |        |
| Blood smear reviews                          | ●       | ●           | ●        |        |
| Participate in grossing                      | ●       | ●           | ●        |        |
| Rotate through the clinical or anatomic labs | ●       | ●           | ●        |        |
| Summer fellowship                            |         | ●           | ●        |        |
| Post-sophomore year fellowship               |         | ●           | ●        |        |
| Lab tours                                    | ●       | ●           | ●        |        |
| Pathology workshops                          | ●       | ●           | ●        |        |
| <b>Online resources</b>                      |         |             |          |        |
| Social media presence                        | ●       | ●           | ●        | ●      |
| Virtual lab tours                            | ●       | ●           | ●        | ●      |
| Virtual pathology electives                  |         | ●           | ●        |        |
| Virtual pathology student interest groups    | ●       | ●           | ●        | ●      |
| CAP residency page                           | ●       | ●           | ●        | ●      |
| AAMC                                         | ●       | ●           | ●        | ●      |
| ICPI                                         | ●       | ●           | ●        | ●      |
| CAP Medical Student Forum                    | ●       | ●           | ●        | ●      |
| Young scholar opportunities (APC, USCAP)     |         | ●           | ●        | ●      |

\*Stages of Specialty Decision-Making:

1. Thought stage: Thinking about specialty choice; recognizing hallmarks of specialties that spark interest.
2. Exploration stage: Investigating available resources and opportunities and identifying role models to learn about the specialties of interest.
3. Decision stage: Participating in activities, rotations, and mentoring to acquire the concrete information and experiences needed to choose a specialty.
4. Action stage: Applying for a residency in the chosen specialty.
